# Supplementary material for: Did you hear about HIV self-testing? HIV self-testing awareness after community-based HIVST distribution in rural Zimbabwe
Source: BMC Infect Dis. 2022 Jan 13;22(Suppl 1):51. doi: 10.1186/s12879-022-07027-9 (PMC8895763; doi:10.1186/s12879-022-07027-9)
Supplement: Supplementary file 1 — Additional file 1. Household questionnaire Zimbabwe. [file 12879_2022_7027_MOESM1_ESM.xlsx]

## Sheet: OVERVIEW
Overview of tabs
Tab	Question count
household enumeration	27
household survey - hoh	14
indiv - eligibility criteria	9
indiv - sociodem	19
indiv ext. - sociodem	14
indiv - sex beh	5
indiv - testing	50
indiv ext. - testing	36
indiv male only - circ	4
indiv ext. - HIV care	9
indiv ext - stigma	7
indiv ext F - IPV	8
indiv - end	2
Note that all yes/no questions (YN) should include don't know and decline to answer options

## Sheet: household enumeration
Household enumeration - list of items
MN, 4 December 2015
To be completed by interviewer/head of household
Question No.	Construct	Variable	Question	Data type	Skips	Ranges for continuous variables
HE01	Clinic ID	clinicid		Choose from list of clinics
HE02	Village ID	villageid		Choose from list of villages
HE03	Household ID/Barcode	hhbarcode		Unique ID or barcode?
HE04	Interviewer ID	interviewerid		Choose from list of interviewers
HE05	Device ID
HE06	Date of interview	intdate		Current date		Should be set to date in device, with option to change if incorrect
HE07	Start time	starttime		Time		Should be set to time in device
HE08	Address	address		Long text	Not asked in ZW
HE09	Phone number 1	phone 1		Phone number	Not asked in ZW
HE10	Phone number 2	phone 2		Phone number	Not asked in ZW
HE11	Phone number 3	phone 3		Phone number	Not asked in ZW
HE12	Lat-Long	latlong		Automatic
HE13	Visit 1 outcome	visitlog1		Choose from list: household interview complete; household interview part complete; household interview refused; housing unit vacant
HE14	Visit 2 outcome	visitlog2		Choose from list: household interview complete; household interview part complete; household interview refused; housing unit vacant
HE15	Visit 3 outcome	visitlog3		Choose from list: household interview complete; household interview part complete; household interview refused; housing unit vacant
To be completed by head of household or representative - all households
Question No.	Construct		Question	Data type	Skips	Ranges
HE16	First name	firstnamehoh	First name of head of household	Short text	Not asked ZW
HE17	Surname	surnamehoh	Surname of head of household	Short text	Not asked ZW
HE18	Count of people in the household	hhct	How many people live in the household? Include all people who normally live and share meals in the household	Number
HE19	Count of people 18 years and older	hhadultct	How many adults 18 years or older live in the household?	Number
HE20	Count of women over age 18 years	hhwmnct	Of the adults in this household (18 years or older), how many are women?	Number
HE21	Count of men over age 18 years	hhmnnct	Of the adults in this household (18 years or older), how many are men?	Number
HE22	Count of girls age 16-17 years	hhadgrlct	Of the people in this household aged 16-17 years, how many are girls?	Number
HE23	Count of boys age 16-17 years	hhadboyct	Of the people in this household aged 16-17 years, how many are boys?	Number
HE24	Count of children age 0-15 years	hhchgirlct	How many children 0-15 years are in this household?	Number
HE25	Identifying vulnerable subpopulations - orphans	orphan	In this household, is there any child whose mother and/or father has died or whose mother and/or father is not resident in the household and is very sick?	YN
HE26	Identifying vulnerable subpopulations - persons with disabilities	disability	In this household, is there any person with a disability? Disability refers to a person who is limited in the kind or amount of activities that he or she can do because of on-going difficulties due to long term physical, mental or health problems	YN
HE27	Identiifying vulnerable subpopulations - domestic workers	domestics	In this household, is there anyone paid or otherwise supported in order to help with cleaning or other tasks in the home?	YN	If No skip to end of section
HE28	Identifying vulnerable subpopulations - domestic workers living in	domlivein	Does this person live in this household?	YN

## Sheet: household survey - hoh
Household survey - questions asked to head of household
MN. 4 December 2015
To be completed by head of household or representative - sampled households (in ZW this is all housholds for Mazowe)
(Note - assume this is all households surveyed [i.e., short and longer forms])
Question No.	Construct	Variable	Question	Data type	Skips	Ranges
HS01	Sex	hohsex	[Only if completed by household representative]Is the head of the household a man or a woman?	1 Male 2 Female	If household head, go to ZHS2, if NOT househould head, go to HS2
HS02	DoB	hohdob	What is the head of household's date of birth? If you don’t know the date of birth, please write 01 Jan 1900	Date	If non-missing, skip to hohedu HS4; if missing, go to HS3	1/1/1926 - 1/1/2000 (or previously used range)
ZHS2	DoB	zhohdob	If it is household head: What is your date of birth? If you don’t know the date of birth, please write 01 Jan 1900	Date	If non-missing, skip to zhohedu, ZHS4, if missing, go to ZHS3
HS3	Age of household head	hohageyrs	How old is the head of household? If you don’t know the age, please write 99	Number	Skip unless don’t know DOB	16-90
ZHS3	Age of household head	zhohageyrs	If it is household head: How old are you? If you don’t know the age, please write 99	Number	Skip unless don’t know DOB	16-90
HS4	Highest formal schooling of household head	hohedu	What is the highest level of formal education attained by the head of household?	1 No formal schooling; 2 Primary incomplete or complete; 3 Some secondary education; 4 O-levels complete; 5 A-levels complete; 6 College or higher 7 I don’t know	Go to HS5
ZHS4	Highest formal schooling of household head	zhohedu	If it is household head: What is the highest level of formal education that you attained?	1 No formal schooling; 2 Primary incomplete or complete; 3 Some secondary education; 4 O-levels complete; 5 A-levels complete; 6 College or higher
HS5	Household assets	hhasset_*	Does your household have:	(Check all that apply) A Electricity B Radio C Working television D Mobile phone E Telephone (landline) F Refrigerator G Bed with mattress H Working automobile or motorcycle I Bicycle J None of the above
HS6	HFIAS - uncertainty	hfiunceryn	In the past four weeks, did you worry that your household would not have enough food?	• Yes (1) • No (2)	If no, skip to hfiqualiyn HS8
HS7	HFIAS - uncertainty frequency	hfiuncerfreq	How often did this happen?	1 = Rarely (once or twice in the past four weeks) 2 = Sometimes (three to ten times in the past four weeks) 3 = Often (more than ten times in the past four weeks)
HS8	HFIAS - quality	hfiqualiyn	In the past four weeks, were you or any household member not able to eat the kinds of foods you preferred because of a lack of resources?	• Yes (1) • No (2)	If no, skip to hfiquantyn HS10
HS9	HFIAS - quality frequency	hfiqualifreq	How often did this happen?	1 = Rarely (once or twice in the past four weeks) 2 = Sometimes (three to ten times in the past four weeks) 3 = Often (more than ten times in the past four weeks)
HS10	HFIAS - quantity	hfiquantyn	Did you or any household member go to sleep at night hungry because there was not enough food?	• Yes (1) • No (2)	If no, skip to end of section
HS11	HFIAS - quantity frequency	hfiquantfreq	How often did this happen?	1 = Rarely (once or twice in the past four weeks) 2 = Sometimes (three to ten times in the past four weeks) 3 = Often (more than ten times in the past four weeks)

## Sheet: indiv. - eligibility criteria
Individual survey - eligibility to complete survey
MN, 4 December 2015
IN ZW, THIS SECTION IS INTERVIEWER-ADMINISTERED
To be completed by all individuals selected to participate within the household
Note that length of residence will NOT be a criteria for exclusion/inclusion in Malawi/Zambia
	Construct	Measurement	Variable	Data type	Skips	Ranges for continuous variables
A1	Individual ID	Unique identifier/barcode	individ	Unique ID or barcode
IE1	Age - older than 16y	Are you 16 years of age or older?	eligage	YN	If no, skip to end
IE2	Individual consent	Have you consented (or do you consent) to participate?	eligcons	YN	If no, skip to end. If yes, skip to ZIE5. IE3 no longer applicable in Zimbabwe
IE3	Parental consent for ages 16-17	(If participant is 16-17 years old) Has parent/guardian consented to participation?	elig16parent	YN	If no, skip to end If yes skip to ZIE5
IE4	Selected for extended questionnaire	select		Randomly select 1/5 (or so) individuals for extended household/individual questionnaire.	Not including in ZW for the Mazowe pilot
ZIE5	Usual household member	Have you resided in this community for the past three months?	eligresid2mos	YN	If no, skip to end
ZIE6	Identifying household rep	Is this a household head or rep?		1 = Household head 2 = Household head rep 3 = Not head/rep
A2 (NB new question)	Relationship to head of household	What is your relationship to the head of household?	hohrel	01 = Head 02 = Wife or husband 03 = Son or daughter 04 = Son-in-law or daughter-in-law 05 = Grandchild 06 = Parent 07 = Parent-in-law 08 = Brother or sister 09 = Niece or nephew 10 = Co-wife 11 = Adopted/foster/stepchild 12 = Other relative 13 = Domestic servant 14 = Lodger 15 = Not related 98 = Don't know	If hohrel = 1, skip to literate
A3	Sex	(Interviewer to indicate)	respsex	1 Male 2 Female

## Sheet: indiv. - sociodem
Individual - sociodemographics
MN, 4 December 2015
To be completed by all individuals selected to participate within the household
Question No.	Construct	Wording of question	Variable	Data entry	Skips	Ranges for continuous variables
A4	Date of birth	What is your date of birth? If you don’t know the date of birth, please write 01 Jan 1900	respdob	Date	If non-missing, skip to edu A6	1/1/1926 - 1/1/2000 (or previously used range)
A5	Age in years	How old are you? If you don’t know the age please write 99	respageyrs	Number		16-99
A6	Educational attainment	What was the highest level of education that you have completed?	edu	1 No formal schooling; 2 Primary incomplete or complete; 3 Some secondary education; 4 O-levels complete; 5 A-levels complete; 6 College or higher
A7	Literacy	Can you read a newspaper or letter?	literate	YN
A8	Employment status	Do you receive a regular salary? By regular salary, I mean money that is paid by the employer daily, weekly, or monthly during the last two months or longer	salary	YN
ZA10	Occupation	What is your current occupation?	occupation	1 Student; 2 Subsistence farmer; 3 Self-employed; 4 Formal employment;
ZA11	Tribe/ethinic group	What tribe/ethnic group do you belong to?	tribe	1 Shona 2 Ndebele 3 Kalanga 4 Tonga 5 Other 6 I don’t wish to answer
ZA12	Religion	What is your religion?	religion	• Roman Catholic (1) • Anglican (2) • Lutheran (3) • Methodist (4) • Baptist (5) • Presbyterian (6) • Apostolic (7) • Pentecostal (8) • Moslem (9) • African traditional religion (10) • Other (11) • No religion (12)
A09	Self-reported health	How do you rate your general health	srhealth	1 Very good 2 Good 3 Fair 4 Poor 5 I don’t wish to answer
A11	Duration of residence	Did you live here 12 months ago? That is, did you live here in [MO] 2015?	residlastyr	YN	If yes, skip to marital A14
A12	Move-in date if less than 1 year resident	In what month did you move to this dwelling? (Reword dates based on time of interview)	movedate	Date (MM/YYYY)		Year prior to interview date
A13	Marital status	What is your current marital status?	marital	1 Married 2 Never married 3 Widowed/separated/divorced	If marital=2 or 3, skip to children - A18
ZA15	Whether married before	Is this your first marriage?	prevmarr	• Yes, first marriage (1) • No, remarried after divorce (2) • No, remarried after widowed (3) • N/A (9)
ZA16	Whether in a polygamous marrirage	[IF Male]: Do you have more than one wife? [IF FEMALE]: Does your husband have another wife or wives?	polygamy	• Yes (1) • No (2)	Skip to A15 if NO
ZA17	Number of wives	[IF Male]: How many wives do you have? [IF FEMALE]: How many wives does your husband have?	numwives	number
A14	Partnership	How long have you been together with your spouse/partner? [If man has >1 wife], How long have you been together with your first spouse/partner?	partnerlength	1 <1 year 2 1-5 years 3 More than 5 years
A15	Living with spouse/partner	Are you currently living with your spouse/partner?	livepartner	YN
A16	Ever widowed	Have you ever lost a spouse due to death?	widowed	YN
A17	Children	How many biological children do you have?	children	Number(0-20)

## Sheet: indiv. ext - decision
Individual - decision-making
MN, 4 December 2015
To be completed by SELECTED individuals ONLY (women and men)
Question No.	Construct	Wording of question	Variable	Data entry	Skips	Ranges for continuous variables	Notes
AX1	Decision-making - health	Who usually makes decisions about health care for yourself?	decision1	1 You 2 Your partner 3 You or your partner or spouse jointly 4 Someone else			From DHS 2010
AX2	Decision-making - household purchases	Who usually makes decisions about major household purchases?	decision2	1 You 2 Your partner 3 You or your partner or spouse jointly 4 Someone else			From DHS 2010
AX3	Decision-making - family visits	Who usually makes decisions about visits to your family or relatives	decision3	1 You 2 Your partner 3 You or your partner or spouse jointly 4 Someone else			From DHS 2010

## Sheet: indiv. ext - sociodem (2)
Individual - sociodemographics
MN, 4 December 2015
To be completed by SELECTED individuals ONLY
Question No.	Construct	Wording of question	Variable	Data entry	Skips	Ranges for continuous variables
AE01	Health service utilization - frequency	How many times have you been to a health care facility in the past 12 months, whether it was for yourself or someone else?	healthfrequency	Number		0-100
AE02	Health service utlization - time last needed facility visit	When was the last that you needed to go to a health care facility, whether it was for yourself or someone else?	healthneed	MY
AE03	Health service utilization - reason last needed facility visit	What reason best describes why you last needed to go to a health care facility?	healthlastneed	1 Medical check-up 2 HIV testing or care 3 ANC 4 VMMC 5 Reproductive health care 6 Child health care 7 Exam, diagnosis or treatment for chronic illness 8 Accompany partner or spouse for appointment 9 Other
AE04	Health service utilization - health care obtained	The last time you needed to go to a health care facility, did you go?	healthobtained	1 Yes 2 No	If healthobtained = 1, skip to wellbeing1
AE05	Health service utlization - health care not obtained	What reasons best explain why you did not go to a health care facility?	healthnotobtained	1 Partner wouldn't let me go 2 Other family wouldn't let me go 3 Did not have money to go 4 Could not take time off work to go 5 Health facilities offer poor quality services 6 Don't trust health service provider 7 Did not feel sick enough 8 Other
AE06	Subjective well being -worthwhile	wellbeing1	Overall, to what extent do you feel the things you do in your life are worthwhile? Please choose a number on the scale where the value 1 means "not at all worthwhile" and the value 10 means "very worthwhile".	number		1-10
AE07	Risk aversion	risk1	How do you see yourself: Are you generally a person who is fully prepared to take risks or do you try and avoid taking risks? Please choose a number on the scale where the value 1 means "not at all willing to take risks" and the value 10 means "very willing to take risks".	number		1-10
AE08	Risk aversion - Life expectancy	risk2	What is the likelihood that you will live to age 60?	1 = Highly unlikely) 2 = Somewhat unlikely 3 = Unsure 4 = Somewhat likely 5 = Highly likely	Skip if respondent age>=60

## Sheet: indiv. ext - sociodem
Individual - sociodemographics
MN, 4 December 2015
Below are some statements about feelings and thoughts. Please press on one box only by each statement that best describes how you felt over over the LAST TWO weeks
		ALL PPTS IN MAZOWE PILOT
Question No.	Construct	Variable	Wording of question	Data entry	Skips	Ranges for continuous variables
ZAE1	Thinking too much	deepthoughts	There were times in which I was thinking deeply or thinking about many things.	YN
ZAE2	Lack of concentration	concentrate	I found myself sometimes failing to concentrate	YN
ZAE3	Irritability	irritability	I lost my temper or got annoyed over trivial matters	YN
ZAE4	Disturbing dreams	nightmares	I had nightmares or bad dreams	YN
ZAE5	Perceptual symptoms	hallucination	I sometimes saw or heard things which others could not see or hear	YN
ZAE6	Stomach ache	tummyache	My stomach was aching	YN
ZAE7	Being startled	trivfear	I was frightened by trivial things	YN
ZAE8	Poor sleep	sleepdisturb	I sometimes failed to sleep or lost sleep	YN
ZAE9	Tearfulness	tearful	There were moments when I felt life was so tough that I cried or wanted to cry	YN
ZAE10	Tiredness	tiredness	I felt run down (tired)	YN
ZAE11	Suicidal thoughts	suicide	At times I felt like committing suicide	YN
ZAE12	Difficulty enjoying daily activities	nojoy	I was generally unhappy with things that I would be doing each day	YN
ZAE13	Impairment of functioning	worklag	My work was lagging behind	YN
ZAE14	Difficulty making decisions	probdecide	I felt I had problems in deciding what to do	YN

## Sheet: indiv - sex beh
Individual - sexual behaviour
MN, 7 December 2015
To be completed by all individuals selected to participate within the household
Prompt: Now I would like to ask you questions about your sexual activity in order to gain a better understanding of some important life issues. Let me assure you that your answers are completely confidential and will not be told to anyone.
Question No.	Construct	Wording of question	Variable name	Data type	Skips	Ranges for continuous variables	Notes
G1	In partnership YN	Do you have a steady partner?	steadyyn	YN	If no, skip to otheryn G4
G2	Steady partner - count	If yes, how many steady partners have you had sex with in the last 3 months?	steadyct	Number		1-25
G3	Condomless sex indicator for each steady partner	In the past 3 months, how often have you not used condoms with this steady partner? (this applies if G2 is 1). If G2 >1, for each of the partners, up to 10 partners, ask the following: In the past 3 months, how often have you not used condoms with your second, third, fourth, fifth etc, up to 10	partnocond_X	1 Condoms every time 2 Condoms some of the time 3 Condoms never used 9 Don’t want to answer	Note that this question will have to be asked for each partner from BG2
G4	Non-steady partner YN	[Apart from your steady partner(s)], have you had sex with anyone else in the last 3 months? (Modify wording as needed based on response to steadyyn) If response to G1 is No, the question should be: Have you had sex with anyone else in the last 3 months?	otheryn	YN	If no, skip to next section
G5	Count of non-steady partners with condomless sex	If yes, with how many people apart from your steady partner have you had sex without using a condom, even if was only on one occasion?	othernocond	Number		1-25

## Sheet: indiv - testing
Individual - past testing
MN, 7 December 2015
To be completed by all individuals selected to participate within the household
Prompt: Now I would like to ask you some questions about your experiences testing with HIV.
Question No.	Construct	Wording of question	Variable name	Data type	Skips	Ranges
B1	Ever tested for HIV	Have you ever been tested for HIV?	evertest	YN	if yes go to B8
B2	Thought about testing	Have you ever thought about having an HIV test?	thoughttest	• No • Yes
B3	Why not tested?	What best describes why you haven' t tested for HIV?	whynottest_X	A Not at risk of being HIV positive B Dont want to know my status C Afraid of testing positive D Afraid of stigma and discrimination from testing for HIV E Partner won’t let me test E2 Parents won't let me test F Other family won't let me test G Do not have money to test H Cannot take time off work to test I Not a dignified thing to do at my age J Health facilities offer poor quality of HTC servi…	If only one reason cited, select this for B3 and go to B4
B04	Most important reason not tested	Of the factors you just mentioned, which was the most important reason you have not tested for HIV?		1 Not at risk of being HIV positive 2 Dont want to know my status 3 Afraid of testing positive 4 Afraid of stigma and discrimination from testing for HIV 5 Partner w on’t let me test 5a Parents won't let me test 6 Other family won't let me test 7 Do not have money to test 8 Cannot take time off work to test 9 Not a dignified thing to do at my age 10 Health facilities offer poor quality of HTC ser…		Only include values checked in whynottest_X
B5	Know of facility	Do you know any facilities offering HIV testing and counselling to people who live around here?		YN	Skip to B7 if no
B6	How easy to reach facility	If you wanted to go there, how easy or difficult would it be for you to go there from your home?		1 Very easy 2 Somewhat easy 3 Somewhat difficult 4 Very difficult 8 Don't know 9 Declined to answer
B7	Had test offered	Have you ever had an HIV test offered to you when you were at a health facility or in your home?	offeredtest	YN		Go to B19
B8	Testing in last twelve months	In the last 12 months, how many times have you tested for HIV?	yrtestcount	Number		1-15
B9	Lifetime test count	In total, how many HIV tests have you had in your lifetime	lifetestcount	Number		1-50 - value must be equal to or greater than yrtestcount B8
B10	Where did HTC occur?	Thinking back to your most recent HIV test, where did this occur?	wheretest	1 = Hospital, clinic or health center (not ANC) 2 = ANC centre 3 = VCT centre 4 = HTC in the community (i.e., mobile VCT) 5 = At home 6 = Other location
B18	Know results	Do you know the results of your last HIV test?	knowresults	Yes No
D1	HIV care for >1 year - screening for extended testing questions	Have you been in HIV care for over 1 year	hivcare1r	YN	If yes, go to B11
B19	Awareness of follow-up - HIV care	If you were to test positive , do you know how to access appropriate follow-up services? [Follow-up services include care and treatment services, including ART and confirmative testing for those testing positive.]	knowfollowup	YN
B11	Heard of self-testing	Have you heard about HIV self-testing as a method for testing for HIV? [Definition if needed from WHO technical report: HIV self-testing is a process whereby a person who wants to know his or her HIV status collects a specimen, performs a test, and interprets the test result in private.]	heardselftest	YN
B12	How heard of HIV self-testing	Where did you hear about HIV self testing?	howheard_*	Check all that apply	A. Community-based distributor B. Friend or family member C. Other community member D. Health care provider E. Media	If B1 is NO, go to ZB17
B13	Self test ever	Have you ever used a self-test to test for HIV?	selftestever	YN	If no, skip to knowresults	if no go to ZB17
B14	Self test within past 12 months	Within the past 12 months, have you used a self-test to test for HIV	selftest12mos	YN	If no go to ZB17
B15	Where did self-test come from	Thinking back to your most recent HIV self-test, where did you obtain this test kit?	selftestsource	1 = CBDA 2 = VMMC mobilizer 3 = health care facility 4 = partner 5 = parent 6 = sibling 7 = other family member 8 = friend 9 = employer 10 = other 11 = prefer not to say
B16	Partner self-test within past 12 months	Have you self-tested with your spouse or steady partner?		Yes No
ZB17	Awareness of community-based distribution of kits	Before your discussion with study staff today, were you aware that community health workers were distributing self-test kits in your community?	comdistaware	• Yes (1) • No (2)
ZB18	Offer of ST in household	Did community health workers come to your house to offer self-test kits?	cbdoffer	• Yes (1) • No (2) • I don’t know	If no or don’t know go to ZB22
ZB19	Kits dropped off at household	Did a community health worker leave any self-test kits for use by members of your household?	kitsdelivered	• Yes (1) • No (2) • I don’t know	If no or don’t know go to ZB22
ZB20	How many kits were dropped off at household	How many kits were left at your house by the community health worker? If you don’t know how many kits were left at your house, write 99	numkits	numeric (0-x)
ZB21	How many self-tested	How many members of your household used the kits for testing themselves for HIV? If you don’t know how many members of your household used kits, write 99	numselftest	numeric (0-x)
ZB22	Receipt/uptake of st kit	Did you get an HIV self-test kit for your use, yourself?	receivekit	• Yes (1) • No (2)	If no go to ZB29a
ZB23	Kit collection point	[if yes] Where did you get it from?	colpoint	• From the CBD at our household (1) • From the CBD elsewhere in the community (2) • From somewhere else (3) • I don’t want to answer (4)	If B13 or B1 is no, skip to ZB25
ZB23a	Forced testing	Did you feel you were able to refuse to accept the self-test kit from the CBD?	forcekit	• Yes (1) • No (2)	If yes skip to ZB24
ZB23b	Why pressured	Why were you unable to refuse? [Mark all that apply]	whypressured	• My wife or husband pressured me to take it(1) • My parent/caregiver pressured me to take it(2) • Another family member pressured me to take it(3) • My employer pressured me to take it (4) • The CBD forced me to take it (5) • Another person forced me to take it (6)
ZB24	Whether self-tested using CBD kits	Did you test yourself for HIV using this kit?	selftestcbd	• Yes (1) • No (2)		If no go to ZB25
ZB24a		Was this HIV self-test the first HIV test you have ever done?		• Yes (1) • No, I had been tested by a health worker (or health workers) before (2) • No, I had previously done another self-test (3)	Go to ZB27
ZB25	Whether kit given to someone else	[if no] Did you give your kit to someone else?	gaveaway	• Yes (1) • No (2)
ZB26	Whether tested a child < 16 years	Did you use your kit to test a child who is less than 16 years old?	testchild	• Yes (1) • No (2)		Skip to ZB29a
ZB27	Result of self-test	What was the result of your self-test?	selftestres	• Positive (1) • Negative (2) • Prefer not to say (3) • Invalid result (4)		If ZB23a is yes, skip to ZB27b; IF ZB23a is no go to ZB27a
ZB27a	Regret self-testing	Now that you have self-tested for HIV and you did not feel able to refuse, do you regret having tested?	stregret	• Yes (1) • No (2)
ZB27b	Forced disclosure	Did anyone make you share your HIV self-test results with him/her when you did not want to?	forceresult	• Yes (1) • No (2)	If no go to ZB27d
ZB27c	Who forced disclosure	Who made you share your results with him/her when you did not want to?	whoresult	• My wife or husband (1) • My parent/caregiver (2) • Other family member (3) • My employer (4) • The CBD (5) • Other person (6)
ZB27d	Any harm from self-testing	Did anything bad happen to you as a result of HIV self-testing?	harm	• Yes (1) • No (2)	If no go to ZB28
ZB27e	Nature of harm	What was the nature of the harm? [Mark all that apply]		• I was made to discose my HIV results when I did not want to (1) • I had an argument with my husband/wife/partner (2) • I had an argument with another family member (3) • I lost my job (4) • I had a physical fight with my husband/wife/partner (5) • I had a physical fight with another family member (6) • I wanted to commit suicide (7) • Other (8)
ZB28	Return of used kit	After testing, did you return your used test kit according to the written instructions?	returnkit	• Yes (1) • No (2)		If no, skip to ZB29a
ZB29	Where kit was dropped off	[If yes] Where did you drop off your used test kit?	placedropped	• CBD's house • New Start Outreach Site (2) • Clinic (3) •Other drop-off place(4)
ZB29a		Since about six weeks ago (when CBDs came to your area to distribute self-test kits), have you been to a clinic or HIV testing facility for any service that you wanted for yourself?		• Yes (1) • No (2)		If no, skip to B17
ZB29b		Where did you go? [Mark all that apply]		• New Start Outreach (1) • Other mobile testing facility (2) • Clinic or hospital (3) • Other(4)
ZB29c		What services did you seek at this facility (or facilities)? [Mark all that apply]		• HIV counselling and testing (1) • HIV counselling only (2) • CD4 testing (3) • Family planning services (4) • TB screening (5) • Blood pressure checks (6) • Cervical cancer screening (7) • Voluntary medical male circumcision (9) • Treatment for an ailment I was suffering from (10) • Filling of my regular prescription/completing my regular medical check-up (11) • Other reason (12)		List each of these services for each facility that is selected at ZB29b If ZB24 is yes, go to ZB30a. If B11 is NO, skip to end of section. Everyone else go to B17
ZB30a	Whether taken up confirmatory testing	Did you go have an HIV test in order to confirm the results you obtained during self-testing?	confimtest	• Yes (1) • No (2)		If no go to B17
ZB30b	Place of confirmatory testing	Where did you go for confirmatory testing?	htsconfirm	• New Start Outreach (1) • Other mobile testing facility (2) • Clinic or hospital (3) • Other(4)
ZB31	Result of confirmatory test	What was the result of the confirmatory testing?	resconfirm	• Positive (1) • Negative (2) • Prefer not to say (3)		If 2-34 skip to B17. If D1 is yes, skip to B17
ZB32	First positive result	Is this the first time you have tested HIV positive?	fisrtpos	• Yes (1) • No (2)
ZB33	Linkage to ART clinic	Have you been to a clinic/hospital to get HIV treatment or care?	artlinkage	• Yes (1) • No (2)
ZB33a		When did you begin treatment or care for HIV?		• Before I tested myself for HIV (1) • After I tested myself for HIV (2)
B17	Recommend self test	Would you recommend self-testing to a friend or family member?	recselftest	YN

[truncated: 6 more sheets: indiv ext. - test+cost, indiv male only - circ, indiv.ext - HIV care, indiv ext - stigma, indiv. ext F - IPV, indiv - end]
